# Supplementary material for: Comparison of Self-reported Measures of Hearing With an Objective Audiometric Measure in Adults in the English Longitudinal Study of Ageing
Source: PubMed Central journal article supplement (PMC7453309; doi:10.1001/jamanetworkopen.2020.15009), 2020-08-27
Supplement: jamanetwopen-3-e2015009-s001.pdf [file jamanetwopen-3-e2015009-s001.pdf]

## Supplementary Online Content

Tsimpida D, Kontopantelis E, Ashcroft D, Panagioti M. Comparison of self-reported measures of hearing with an objective audiometric measure in adults in the English Longitudinal Study of Ageing. *JAMA Netw Open*. 2020;3(8):e2015009.  
doi:10.1001/jamanetworkopen.2020.15009

**eFigure.** Definitions of Categories of Self-reported Hearing Difficulty

This supplementary material has been provided by the authors to give readers additional information about their work.

**eFigure.** Definitions of Categories of Self-reported Hearing Difficulty

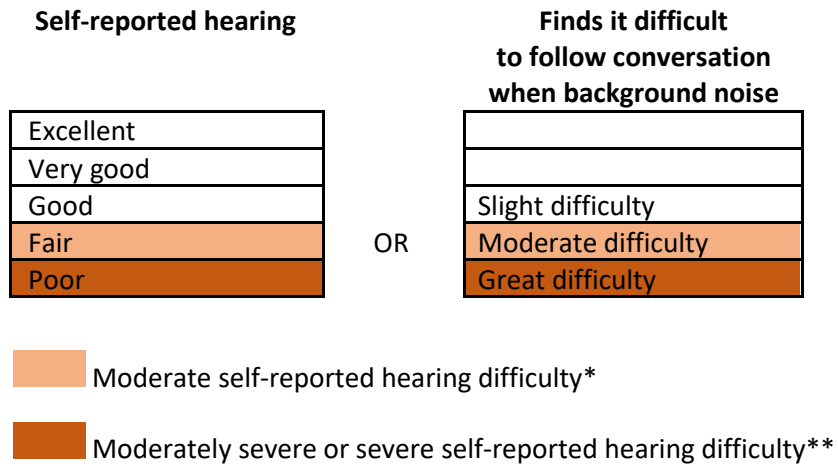

\* Moderate self-reported hearing difficulty: if hearing was *fair* OR had *moderate* difficulty following a conversation in background noise.

\*\* Moderately severe or severe self-reported hearing difficulty: if hearing was *poor* OR had *great difficulty* following a conversation in background noise.
